# Supplementary material for: Regulation of prefrontal cortex myelination by the microbiota
Source: PubMed Central journal article supplement (PMC4872400; doi:10.1038/tp.2016.42), 2016-04-05
Supplement: tp201642x1.pdf [file tp201642x1.pdf]

**Supplementary figure 1: Experimental flow chart**

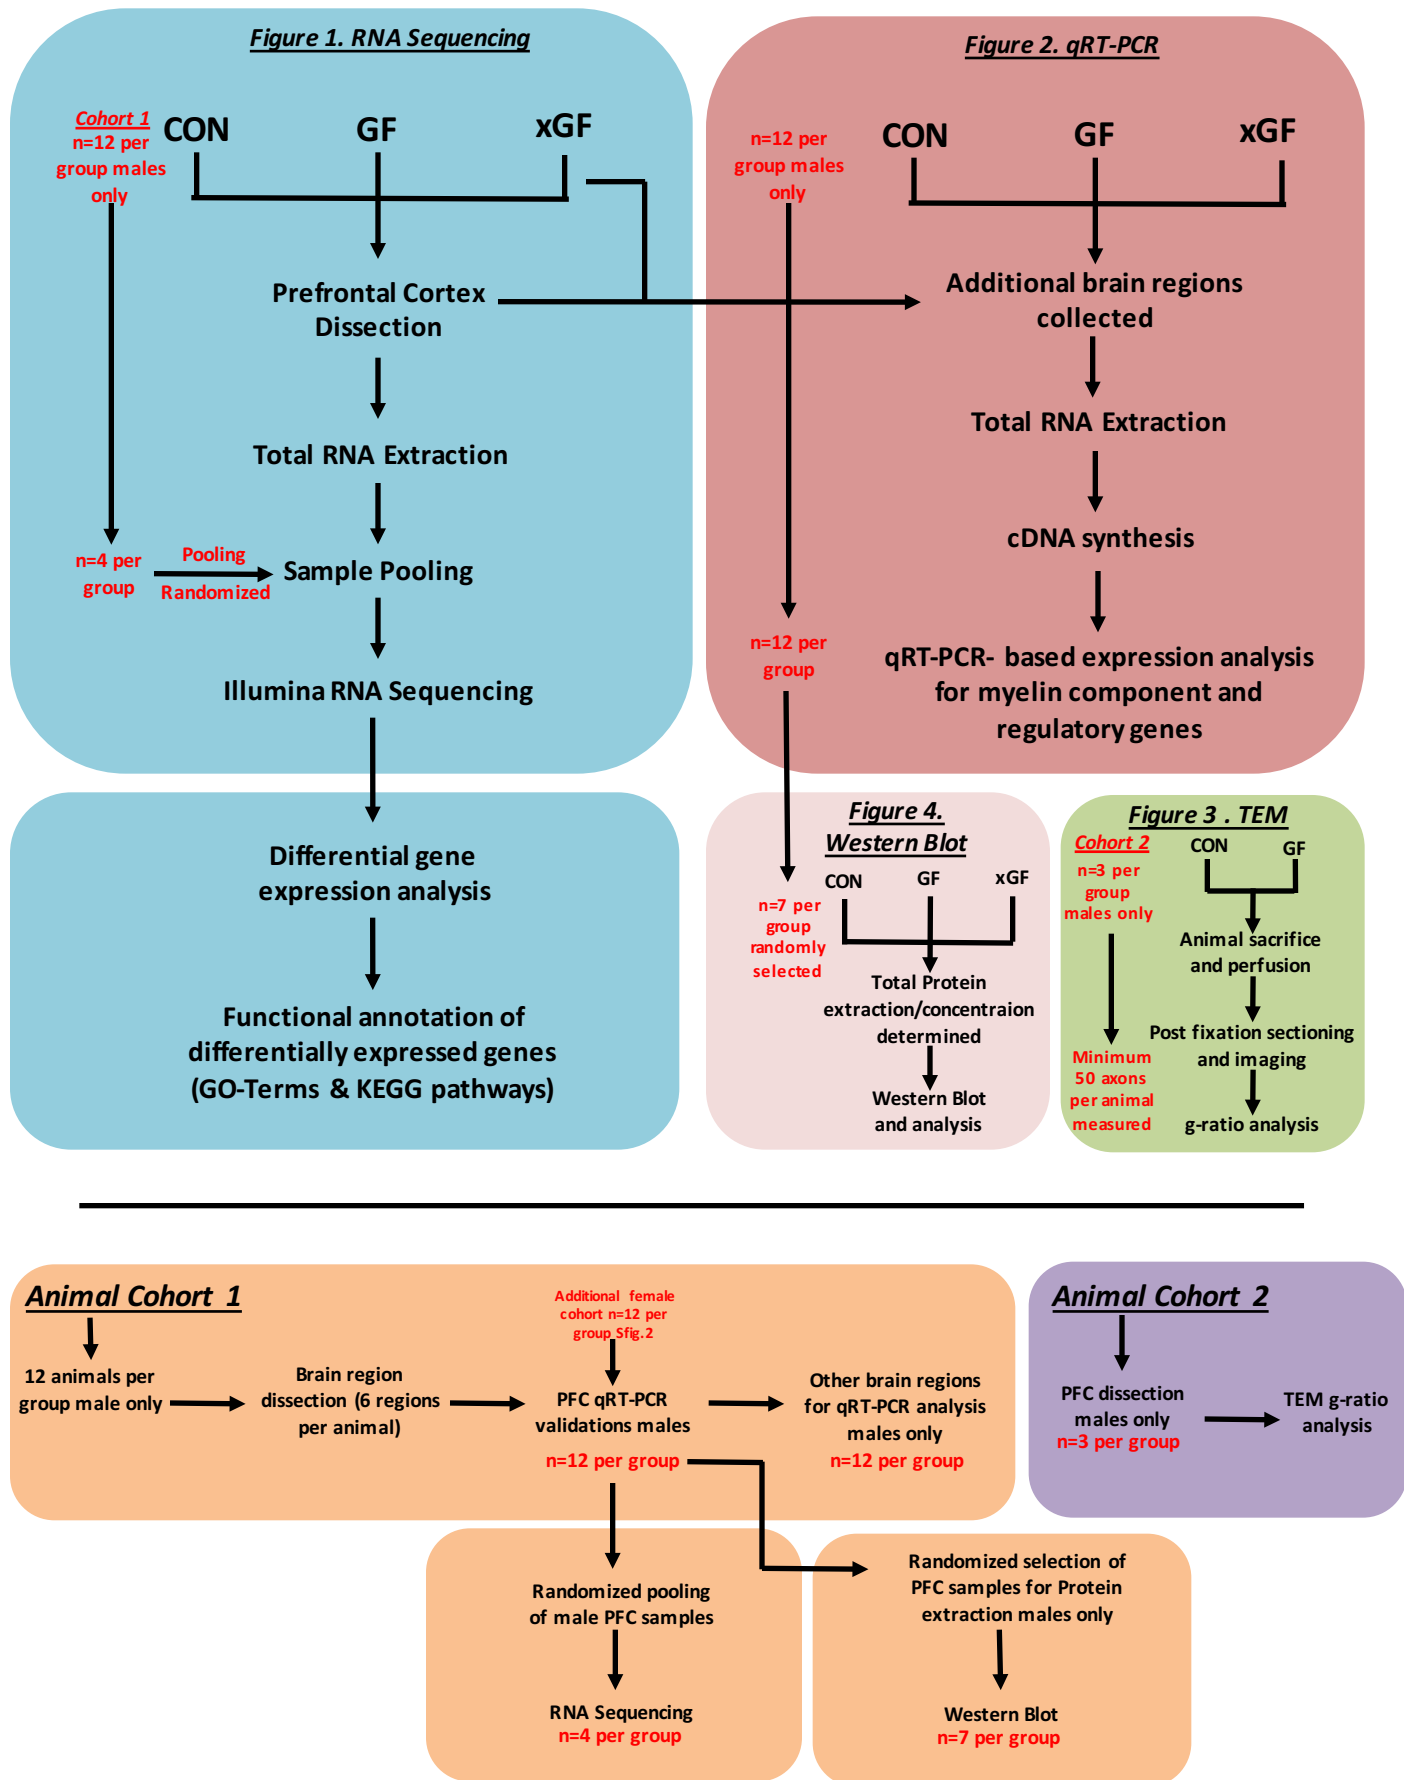

**Figure S1: Experimental flowchart.** Graphical depiction of the animal number and usage for each individual experiment. Each Panel represents the outcome of tissue used for each of the individual main figure.

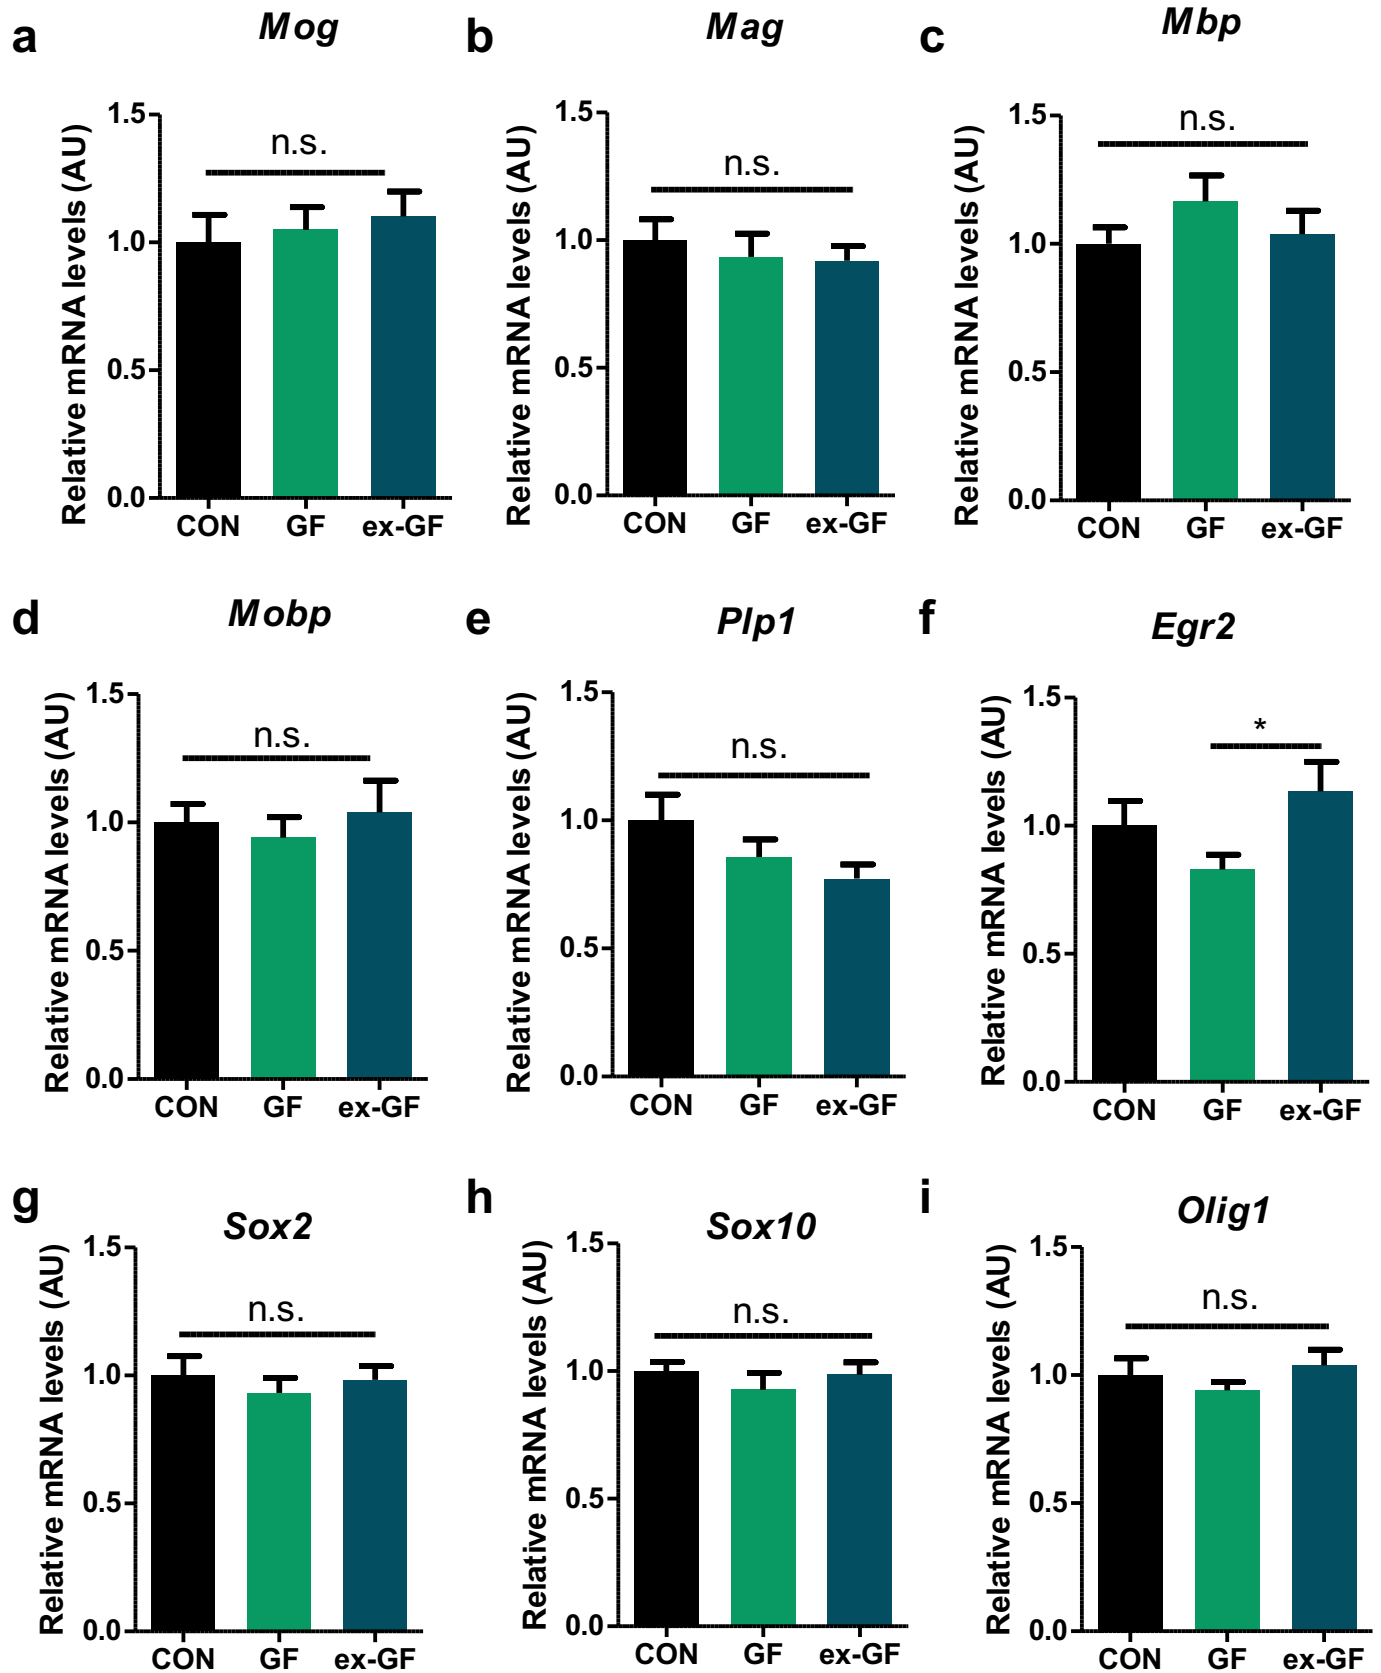

**Figure S2: mRNA expression levels of myelin component and upstream myelin regulatory genes in the PFC of female CON, GF and exGF mice.** No male-equivalent changes in myelin component mRNA levels were found in the PFC of female GF and exGF mice. **(a-i)** qRT-PCR of myelin component gene transcript and myelin regulating transcription factors in the PFC. Bar graphs indicate average values of 12 animals after  $\beta$ -actin normalization relative to average control levels ( $p < 0.05$  \*). Data graphed as  $\pm$  SEM.

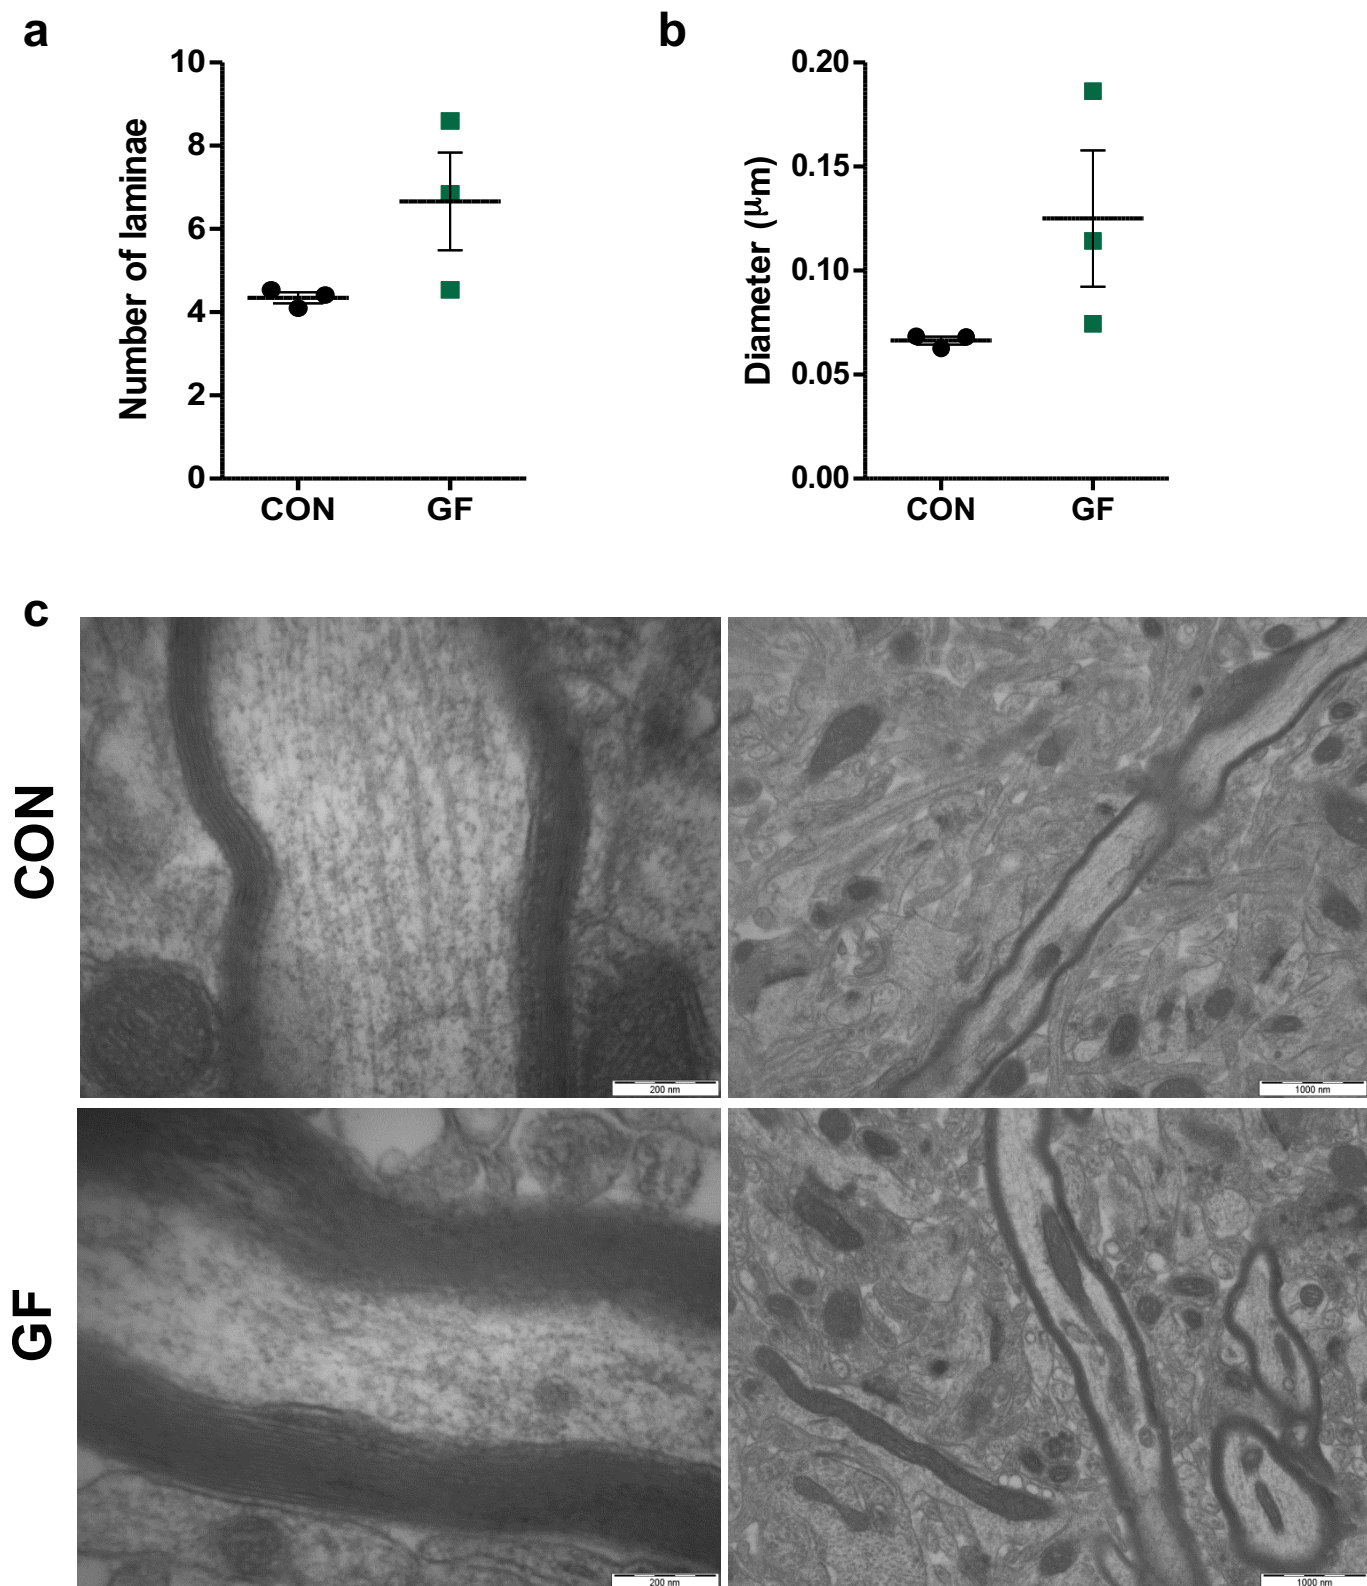

**Figure S3: Increased g-ratio coincides with stronger trend to higher lamina number and myelin diameter. (a)** Average lamina number per animal in the PFC of GF and CON mice. **(b)** Average myelinated diameter per animal **(c)** Electron micrograph of longitudinally sliced axons in the PFC of CON and GF mice. Scale bar 200nm and 1µm. Bar graph data is shown as mean +/- SEM. n.s. indicated  $p > 0.05$ ;  $n = 3$  animals per group;  $n \geq 50$  axons per animal (CON  $n = 187$  axons; GF  $n = 390$  axons).
